# Supplementary material
Source: HighWire-hosted journal article supplement (https://erj.ersjournals.com/content/61/1/2200619)

# Supplementary

## Supplementary results

**Table S1:** Presentation and adverse in-hospital events of hospitalized patients with pulmonary embolism (PE) in Germany in stratified for the year of hospitalization and the COVID-19 infection status.

| <b>Parameters</b>             | <b>Hospitalized patients with<br/>PE 2019<br/><br/>(n=98,485)</b> | <b>Hospitalized patients with<br/>PE 2020<br/>without COVID-19<br/><br/>(n=94,356)</b> | <b>Hospitalized patients with<br/>PE 2020<br/>with COVID-19<br/><br/>(n=3,362)</b> |
|-------------------------------|-------------------------------------------------------------------|----------------------------------------------------------------------------------------|------------------------------------------------------------------------------------|
| <b>Case-fatality rate</b>     | 12,470 (12.7%)                                                    | 11,795 (12.5%)                                                                         | 964 (28.7%)                                                                        |
| <b>Resuscitation</b>          | 5,564 (5.6%)                                                      | 5,115 (5.4%)                                                                           | 275 (8.2%)                                                                         |
| <b>Shock</b>                  | 5,214 (5.3%)                                                      | 5,115 (5.4%)                                                                           | 453 (13.5%)                                                                        |
| <b>Systemic thrombolysis</b>  | 3,917 (4.0%)                                                      | 3,810 (3.9%)                                                                           | 173 (5.1%)                                                                         |
| <b>RV-dysfunction</b>         | 23,205 (23.6%)                                                    | 21,947 (23.1%)                                                                         | 706 (21.0%)                                                                        |
| <b>Treatment on ICU</b>       | 18,241 (18.5%)                                                    | 17,527 (18.6%)                                                                         | 1,325 (39.4%)                                                                      |
| <b>Mechanical ventilation</b> | 4,569 (4.6%)                                                      | 4,532 (4.8%)                                                                           | 638 (19.0%)                                                                        |
| <b>ARDS</b>                   | 786 (0.8%)                                                        | 747 (0.8%)                                                                             | 760 (22.6%)                                                                        |
| <b>Pneumonia</b>              | 26,115 (26.5%)                                                    | 25,664 (27.2%)                                                                         | 2,835 (84.3%)                                                                      |
| <b>ECMO</b>                   | 551 (0.6%)                                                        | 429 (0.5%)                                                                             | 153 (4.6%)                                                                         |
| <b>CT-Angiography</b>         | 64,503 (65.5%)                                                    | 64,021 (67.9%)                                                                         | 2,517 (74.9%)                                                                      |
| <b>Renal insufficiency</b>    | 12,413 (12.6%)                                                    | 11,589 (12.3%)                                                                         | 344 (10.2%)                                                                        |

Abbreviations: ARDS, Acute respiratory distress syndrome; CT= Computed tomography; ECMO, extracorporeal membrane oxygenation; ICU, intensive care unit;

**Table S2:** Associations of patients' characteristics, comorbidities and adverse events with pulmonary embolism in patients with confirmed COVID-19 infection (univariable and multivariable logistic regression models).

| <b>All in-hospital patients with COVID-19 infection</b>      |                            |                  |                                                                                                                                                                                            |                  |
|--------------------------------------------------------------|----------------------------|------------------|--------------------------------------------------------------------------------------------------------------------------------------------------------------------------------------------|------------------|
| <b>(n=176,137; 3362 patients had diagnosis of PE [1.9%])</b> |                            |                  |                                                                                                                                                                                            |                  |
|                                                              | <b>Univariate</b>          |                  | <b>Multivariate</b>                                                                                                                                                                        |                  |
|                                                              |                            |                  | (adjusted for age, sex, cancer, coronary artery disease, heart failure, COPD, arterial hypertension, renal insufficiency, diabetes mellitus, atrial fibrillation, pAVK and hyperlipidemia) |                  |
| <b>Parameters</b>                                            | <b>OR (95% CI)</b>         | <b>P-value</b>   | <b>OR (95% CI)</b>                                                                                                                                                                         | <b>P-value</b>   |
| <b>Age ≥ 70</b>                                              | <b>0.903 (0.844-0.967)</b> | <b>0.004</b>     | 1.029 (0.952-1.112)                                                                                                                                                                        | 0.468            |
| <b>Male Sex</b>                                              | <b>1.208 (1.115-1.376)</b> | <b>&lt;0.001</b> | <b>1.349 (1.205-1.497)</b>                                                                                                                                                                 | <b>&lt;0.001</b> |
| <b>Obesity</b>                                               | <b>1.759 (1.559-1.985)</b> | <b>&lt;0.001</b> | <b>1.875 (1.657-2.121)</b>                                                                                                                                                                 | <b>&lt;0.001</b> |
| <b>Comorbidities</b>                                         |                            |                  |                                                                                                                                                                                            |                  |
| <b>Coronary artery disease</b>                               | <b>0.735 (0.660-0.819)</b> | <b>&lt;0.001</b> | <b>0.683 (0.608-0.767)</b>                                                                                                                                                                 | <b>&lt;0.001</b> |
| <b>Cancer</b>                                                | <b>1.288 (1.121-1.481)</b> | <b>&lt;0.001</b> | <b>1.254 (1.090-1.442)</b>                                                                                                                                                                 | <b>0.002</b>     |
| <b>PAD</b>                                                   | <b>0.790 (0.637-0.981)</b> | <b>0.033</b>     | 0.838 (0.672-1.044)                                                                                                                                                                        | 0.116            |
| <b>COPD</b>                                                  | <b>0.856 (0.741-0.988)</b> | <b>0.033</b>     | 0.815 (0.704-0.944)                                                                                                                                                                        | 0.006            |
| <b>Arterial hypertension</b>                                 | <b>1.000 (0.934-1.070)</b> | <b>0.991</b>     | 0.997 (0.926-1.073)                                                                                                                                                                        | 0.997            |
| <b>Renal insufficiency</b>                                   | <b>0.615 (0.549-0.688)</b> | <b>&lt;0.001</b> | <b>0.553 (0.491-0.623)</b>                                                                                                                                                                 | <b>&lt;0.001</b> |
| <b>Diabetes mellitus</b>                                     | 0.996 (0.921-1.077)        | 0.925            | 0.989 (0.910-1.074)                                                                                                                                                                        | 0.790            |
| <b>Atrial fibrillation</b>                                   | <b>0.837 (0.764-0.917)</b> | <b>&lt;0.001</b> | <b>0.736 (0.666-0.812)</b>                                                                                                                                                                 | <b>&lt;0.001</b> |
| <b>Charlson Index</b>                                        | <b>1.042 (1.030-1.054)</b> | <b>&lt;0.001</b> | <b>1.095 (1.041-1.104)</b>                                                                                                                                                                 | <b>&lt;0.001</b> |

Abbreviations: CI= Confidence interval; COPD= Chronic obstructive pulmonary disease; OR= Odds ratio; PAD= peripheral artery disease

Values in bold indicate that the difference is statistically significance at least in the multivariate regression model ( $p < 0.05$ ).

**Table S3:** Associations of COVID-19 with in-hospital mortality in patients with pulmonary embolism in 2020 (univariable and multivariable logistic regression models).

| <b>All in-hospital patients with pulmonary embolism in 2020</b> |                            |                  |                                                                                                                                                                                            |                  |
|-----------------------------------------------------------------|----------------------------|------------------|--------------------------------------------------------------------------------------------------------------------------------------------------------------------------------------------|------------------|
| <b>(n=97,718; 12,759 patients died [13.1%])</b>                 |                            |                  |                                                                                                                                                                                            |                  |
|                                                                 | <b>Univariate</b>          |                  | <b>Multivariate</b>                                                                                                                                                                        |                  |
|                                                                 |                            |                  | (adjusted for age, sex, cancer, coronary artery disease, heart failure, COPD, arterial hypertension, renal insufficiency, diabetes mellitus, atrial fibrillation, pAVK and Hyperlipidemia) |                  |
| <b>Parameters</b>                                               | <b>OR (95% CI)</b>         | <b>P-value</b>   | <b>OR (95% CI)</b>                                                                                                                                                                         | <b>P-value</b>   |
| <b>COVID-19</b>                                                 | <b>2.814 (2.605-3.040)</b> | <b>&lt;0.001</b> | <b>3.155 (2.910-3.420)</b>                                                                                                                                                                 | <b>&lt;0.001</b> |

Abbreviations: CI= Confidence interval, OR= Odds ratio;

Values in bold indicate that the difference is statistically significance at least in the multivariate regression model (p<0.05).

**Figure S1:**

**Panel A** - Proportion of deaths (red line) in COVID-19 patients with PE (blue bars) stratified for age-decades of life

**Panel B** - Proportion of computed tomography pulmonary angiography (green line) in COVID-19 patients with PE (blue bars) stratified for age-decades of life

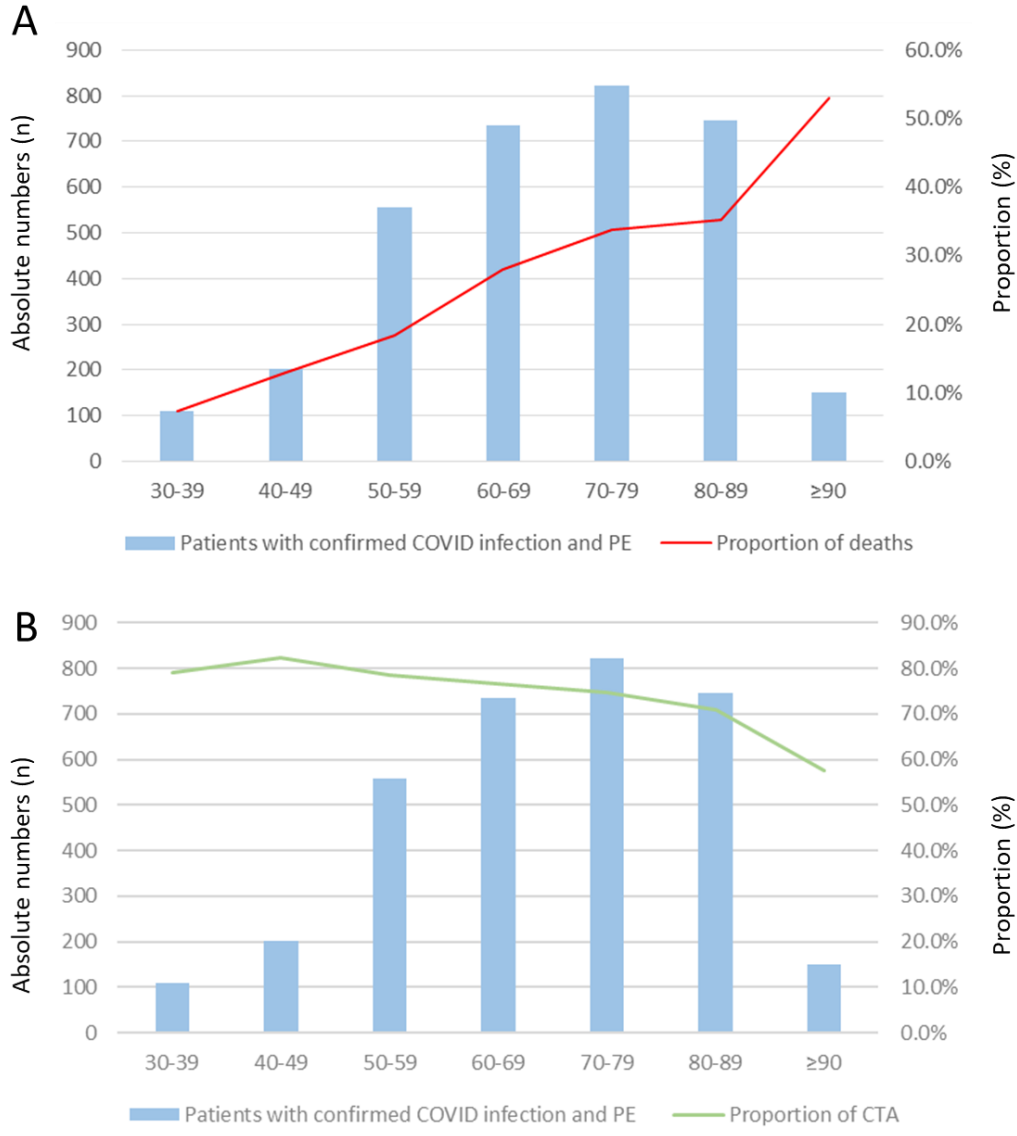

**Figure S2:** Proportion of PE (blue line) in COVID-19 patients undergoing surgeries (orange bars) stratified for different kind of surgeries.

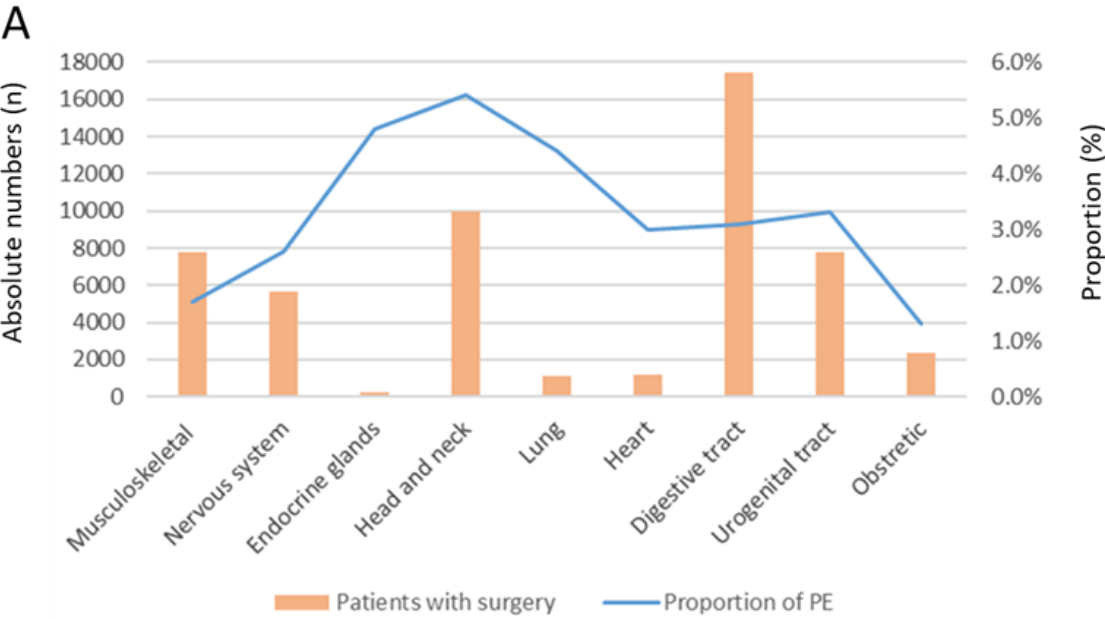

Supplement: inline-supplementary-material-1 [file inline-supplementary-material-1.pdf]
