# Supplementary material
Source: HighWire-hosted journal article supplement (https://erj.ersjournals.com/content/61/1/2200619)

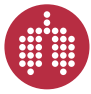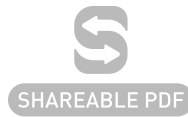

# COVID-19 infection and its impact on case fatality in patients with pulmonary embolism

Lukas Hobohm <sup>1,2,10</sup>, Ingo Sagoschen<sup>1,10</sup>, Stefano Barco <sup>2,3</sup>, Ioannis T. Farmakis <sup>2,4</sup>, Ugo Fedeli<sup>5</sup>, Sebastian Koelmel<sup>6</sup>, Tommaso Gori<sup>1</sup>, Christine Espinola-Klein<sup>1</sup>, Thomas Münzel<sup>1,7</sup>, Stavros Konstantinides <sup>2,8</sup> and Karsten Keller <sup>1,2,9</sup>

<sup>1</sup>Department of Cardiology, University Medical Center of the Johannes Gutenberg University Mainz, Mainz, Germany. <sup>2</sup>Center for Thrombosis and Hemostasis (CTH), University Medical Center of the Johannes Gutenberg University Mainz, Mainz, Germany. <sup>3</sup>Department of Angiology, University Hospital Zurich, Zurich, Switzerland. <sup>4</sup>Cardiology Department, AHEPA University Hospital, Aristotle University of Thessaloniki, Thessaloniki, Greece. <sup>5</sup>Epidemiological Department, Azienda Zero, Padova, Italy. <sup>6</sup>Department of Internal Medicine, Triemli Hospital Zurich, Zurich, Switzerland. <sup>7</sup>German Center for Cardiovascular Research (DZHK), Partner Site Rhine Main, Mainz, Germany. <sup>8</sup>Department of Cardiology, Democritus University of Thrace, Alexandroupolis, Greece. <sup>9</sup>Medical Clinic VII, Department of Sports Medicine, University Hospital Heidelberg, Heidelberg, Germany. <sup>10</sup>L. Hobohm and I. Sagoschen contributed equally and share first authorship.

Corresponding author: Lukas Hobohm ([lukas.hobohm@unimedizin-mainz.de](mailto:lukas.hobohm@unimedizin-mainz.de))

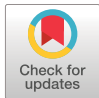

Shareable abstract (@ERSpublications)

This study demonstrated a considerable impact of COVID-19 on adverse outcomes of patients with pulmonary embolism in 2020, which should guide attention to this special population with regard to antithrombotic prevention and diagnostic strategies <https://bit.ly/3zz3OjZ>

**Cite this article as:** Hobohm L, Sagoschen I, Barco S, *et al.* COVID-19 infection and its impact on case fatality in patients with pulmonary embolism. *Eur Respir J* 2023; 61: 2200619 [DOI: 10.1183/13993003.00619-2022].

This single-page version can be shared freely online.

Copyright ©The authors 2023.

This version is distributed under the terms of the Creative Commons Attribution Non-Commercial Licence 4.0. For commercial reproduction rights and permissions contact [permissions@ersnet.org](mailto:permissions@ersnet.org)

This article has an editorial commentary: <https://doi.org/10.1183/13993003.02447-2022>

Received: 23 March 2022  
Accepted: 20 July 2022

## Abstract

**Background** Although a high prevalence of pulmonary embolism (PE) has been reported in association with coronavirus disease 2019 (COVID-19) in critically ill patients, nationwide data on the outcome of hospitalised patients with COVID-19 and PE are still limited. Thus, we investigated seasonal trends and predictors of in-hospital death in patients with COVID-19 and PE in Germany.

**Methods** We used a German nationwide inpatient sample to analyse data on hospitalisations among COVID-19 patients with and without PE during 2020, and to detect changes in PE prevalence and case fatality in comparison with 2019.

**Results** We analysed 176 137 COVID-19 hospitalisations in 2020; PE was recorded in 1.9% (n=3362) of discharge certificates. Almost one-third of patients with COVID-19 and PE died during the in-hospital course (28.7%) compared with COVID-19 patients without PE (17.7%). Between 2019 and 2020, numbers of PE-related hospitalisations were largely unchanged (98 485 *versus* 97 718), whereas the case fatality rate of PE increased slightly in 2020 (from 12.7% to 13.1%; p<0.001). Differences in case fatality were found between PE patients with and without COVID-19 in 2020 (28.7% *versus* 12.5%; p<0.001), corresponding to a 3.1-fold increased risk of PE-related death (OR 3.16, 95% CI 2.91–3.42; p<0.001) in the presence of COVID-19.

**Conclusions** In Germany, the prevalence of PE events during hospitalisations was similar in 2019 and 2020. However, the fatality rate among patients with both COVID-19 and PE was substantially higher than that in those with only one of these diseases, suggesting a life-threatening additive prognostic impact of the COVID-19–PE combination.

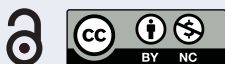

Supplement: inline-supplementary-material-2 [file inline-supplementary-material-2.pdf]
